# Supplementary material for: Carboxymethylcellulose encapsulated fingolimod, siRNA@ZnO hybrid nanocomposite as a new anti-Alzheimer's material
Source: Royal Society of Chemistry journal article supplement (doi:10.1039/d4ra01965b), 2024-01-01

Raw data file of full western blots

Experiment 1

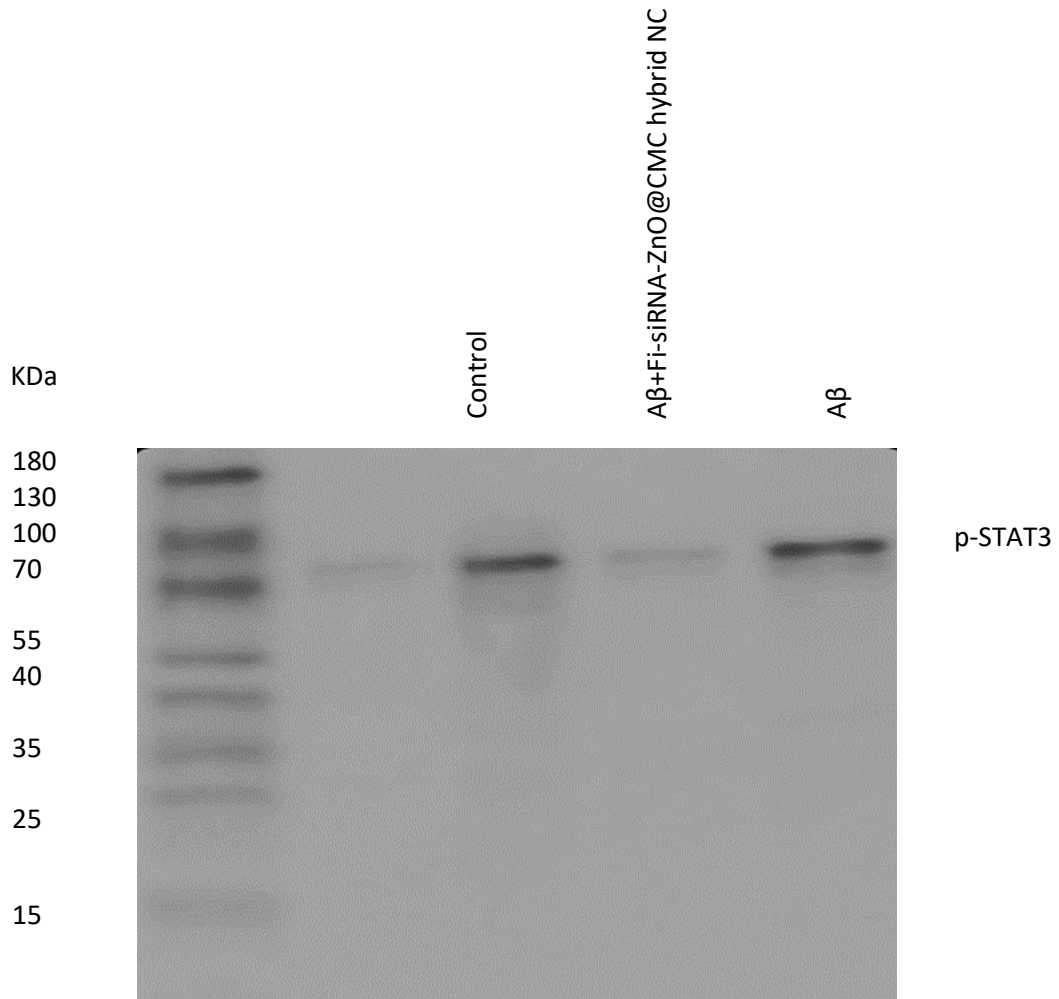

**Experiment 2**

kDa

180  
130  
100  
70  
55  
40  
35  
25  
15

Control

A $\beta$ +Fi-siRNA-ZnO@CMC hybrid NC

A $\beta$

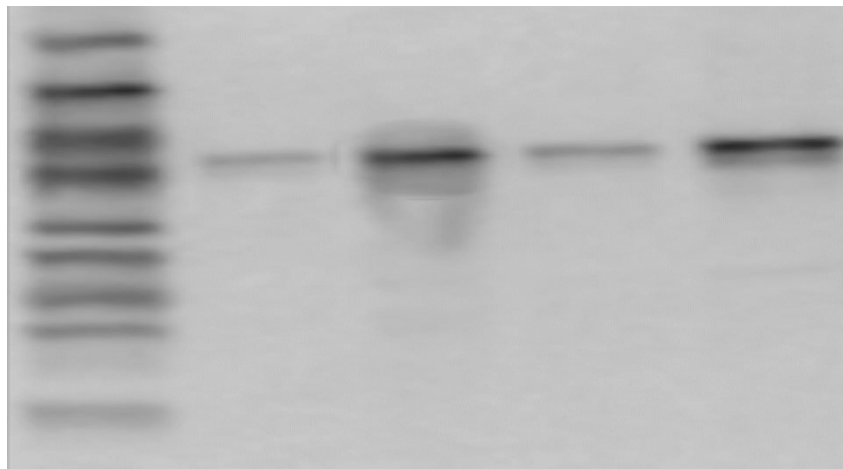

P-STAT3

**Control**

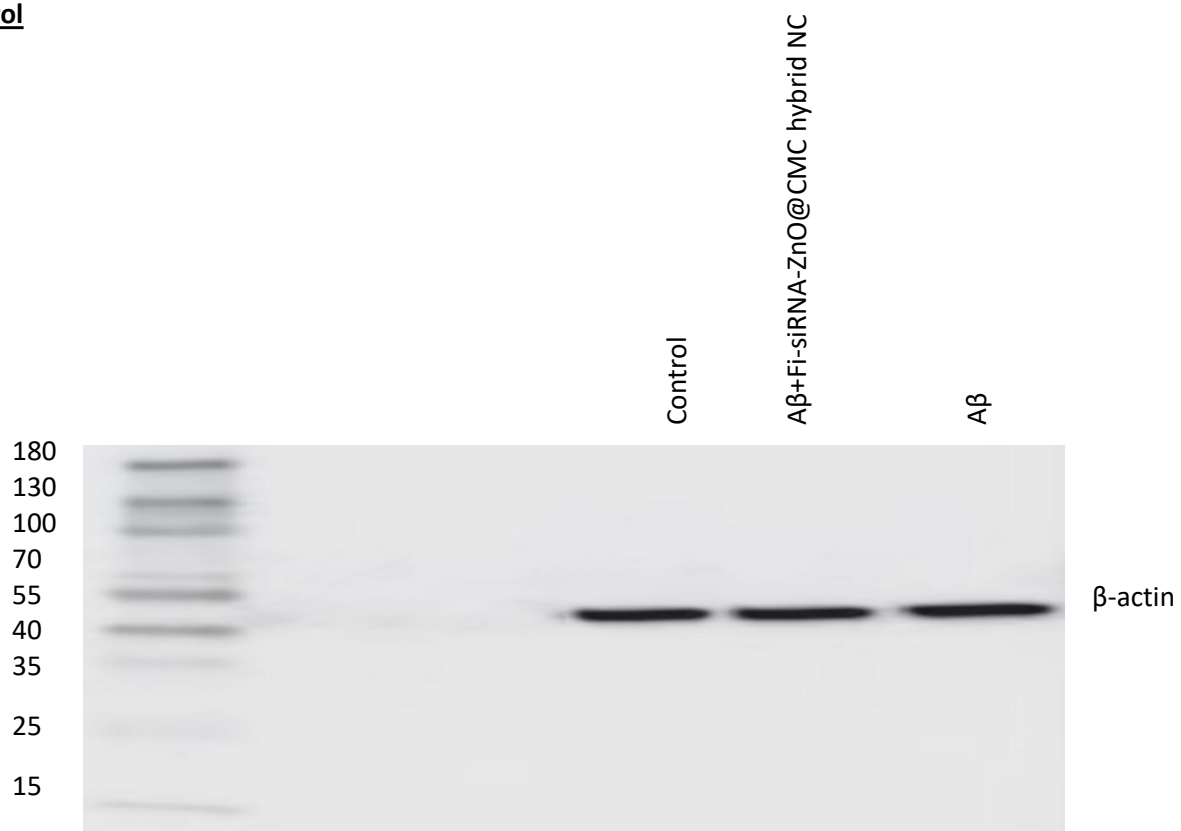

Supplement: d4ra01965b1.pdf [file d4ra01965b1.pdf]
