# Supplementary material for: Carboxymethylcellulose encapsulated fingolimod, siRNA@ZnO hybrid nanocomposite as a new anti-Alzheimer's material
Source: Royal Society of Chemistry journal article supplement (doi:10.1039/d4ra01965b), 2024-01-01
Supplement: d4ra01965b2.pdf [file d4ra01965b2.pdf]

## Supporting information file

for

### **Carboxymethylcellulose Encapsulated Fingolimod, siRNA @ ZnO Hybrid Nanocomposite as Anti-Alzheimer's New Material**

Nuha B. Aljohani,<sup>a,b</sup> Safaa Y. Qusti,<sup>a</sup> Madeeha Alsiny,<sup>a</sup> Fadwa Aljoud,<sup>c</sup> Norah Bakheet

Aljohani,<sup>d</sup> Eman S. Alsolami,<sup>e</sup> Khalid A. Alamry<sup>e</sup> and Mahmoud A. Hussein<sup>\*e,f</sup>

<sup>a</sup> Biochemistry Department, Faculty of Science, King Abdul Aziz University, Jeddah 21589,  
Kingdom of Saudi Arabia

<sup>b</sup> Biochemistry Department, faculty of science, University of Tabuk, Tabuk, Kingdom of Saudi  
Arabia

<sup>c</sup> Regenerative medicine unit, King Fahd Medical Research Centre, King Abdul Aziz University,  
Jeddah 21589, Saudi Arabia

<sup>d</sup> King Abdul Aziz University Hospital, Jeddah, Kingdom of Saudi Arabia

<sup>e</sup> Chemistry Department, Faculty of Science, King Abdulaziz University, P.O. Box 80203,  
Jeddah 21589, Saudi Arabia

<sup>f</sup> Chemistry Department, Faculty of Science, Assiut University, Assiut 71516, Egypt

\* Corresponding author: Mahmoud A. Hussein (maabdo@kau.edu.sa,  
mahussein74@yahoo.com)

## Table of Content

| No | Title                                                                                                                                                                                                                                                   | Page |
|----|---------------------------------------------------------------------------------------------------------------------------------------------------------------------------------------------------------------------------------------------------------|------|
| 1  | <b>Fig. S1:</b> In vitro fingolimod release for the nanocomposite (without H <sub>2</sub> O <sub>2</sub> ) after 0.5 hour.....                                                                                                                          | S3   |
| 2  | <b>Fig. S2:</b> In vitro fingolimod release for the nanocomposite (without H <sub>2</sub> O <sub>2</sub> ) after 1 hour.....                                                                                                                            | S4   |
| 3  | <b>Fig. S3:</b> In vitro fingolimod release for the nanocomposite (without H <sub>2</sub> O <sub>2</sub> ) after 3,4, 6, 8, and 10 (hours) (same chromatogram results for these hours because the release of fingolimod was stable at these times)..... | S5   |
| 4  | <b>Fig. S4:</b> In vitro fingolimod release for the nanocomposite (with H <sub>2</sub> O <sub>2</sub> ) after 0.5 hour.....                                                                                                                             | S6   |
| 5  | <b>Fig. S5:</b> In vitro fingolimod release for the nanocomposite (with H <sub>2</sub> O <sub>2</sub> ) after 1 hour.....                                                                                                                               | S7   |
| 6  | <b>Fig. S6:</b> In vitro fingolimod release for the nanocomposite (with H <sub>2</sub> O <sub>2</sub> ) after 3,4, 6, 8, and 10 (hours) (same chromatogram results for these hours because the release of fingolimod was stable at these times).....    | S8   |

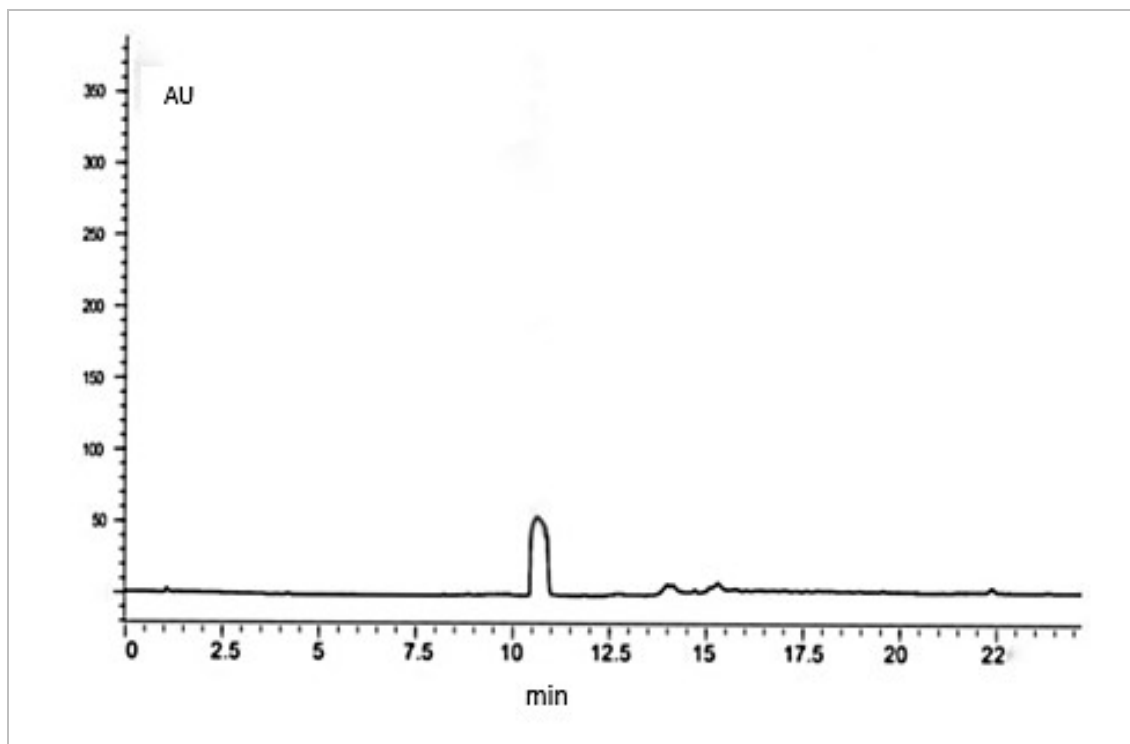

**Fig. S1**

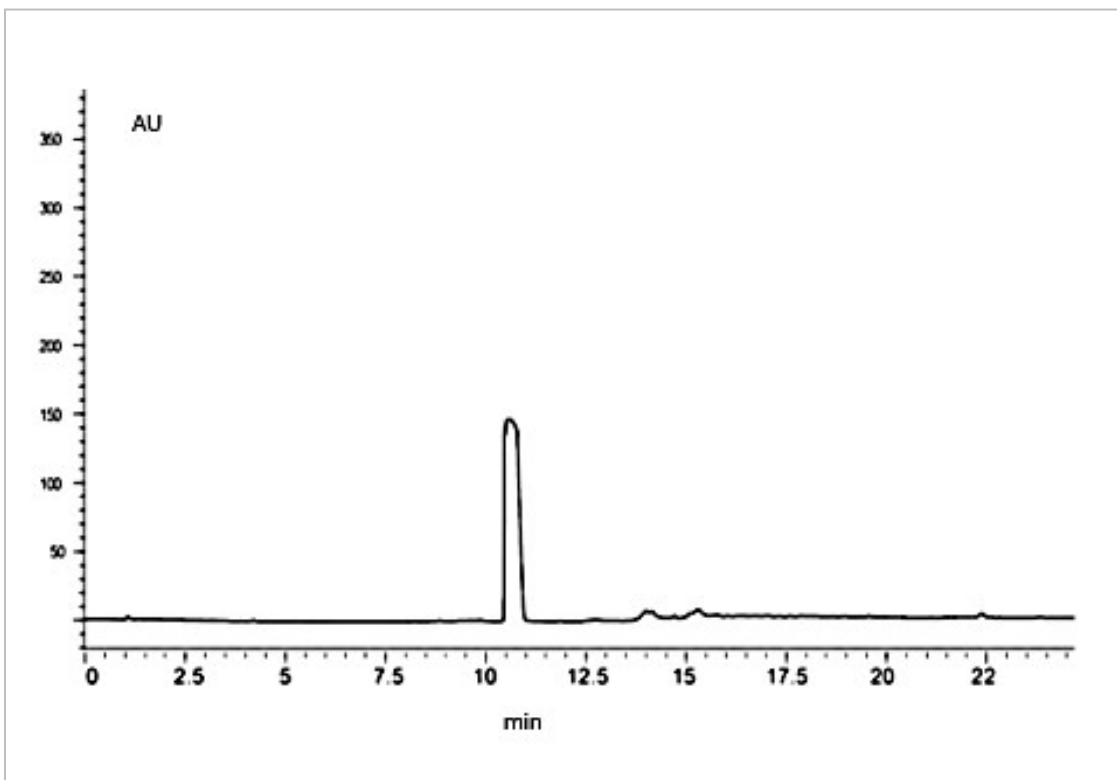

**Fig. S2**

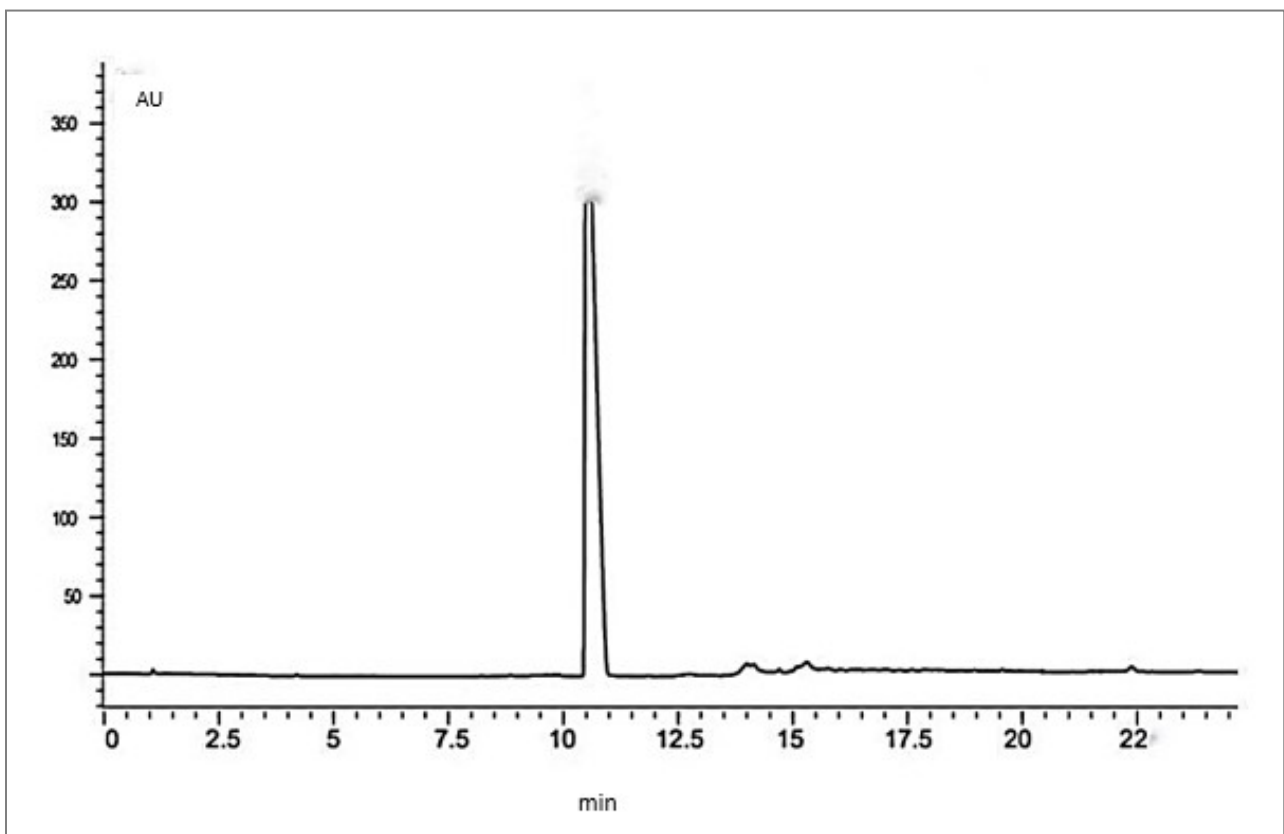

**Fig. S3**

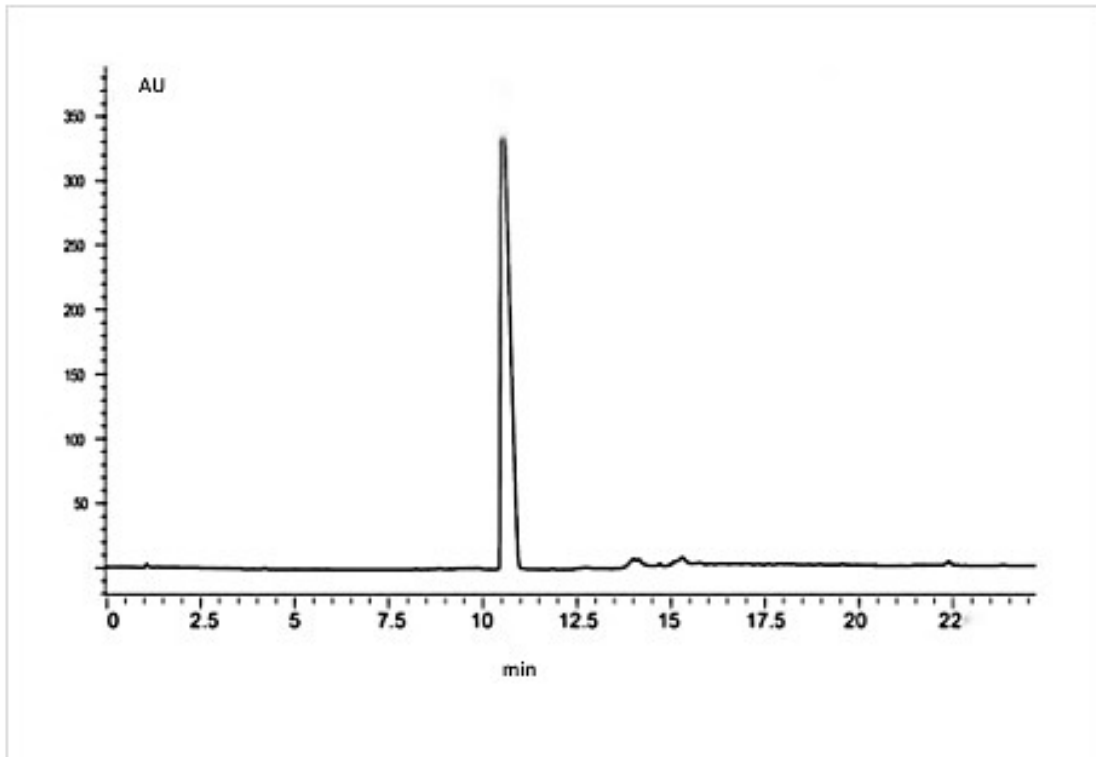

**Fig. S4**

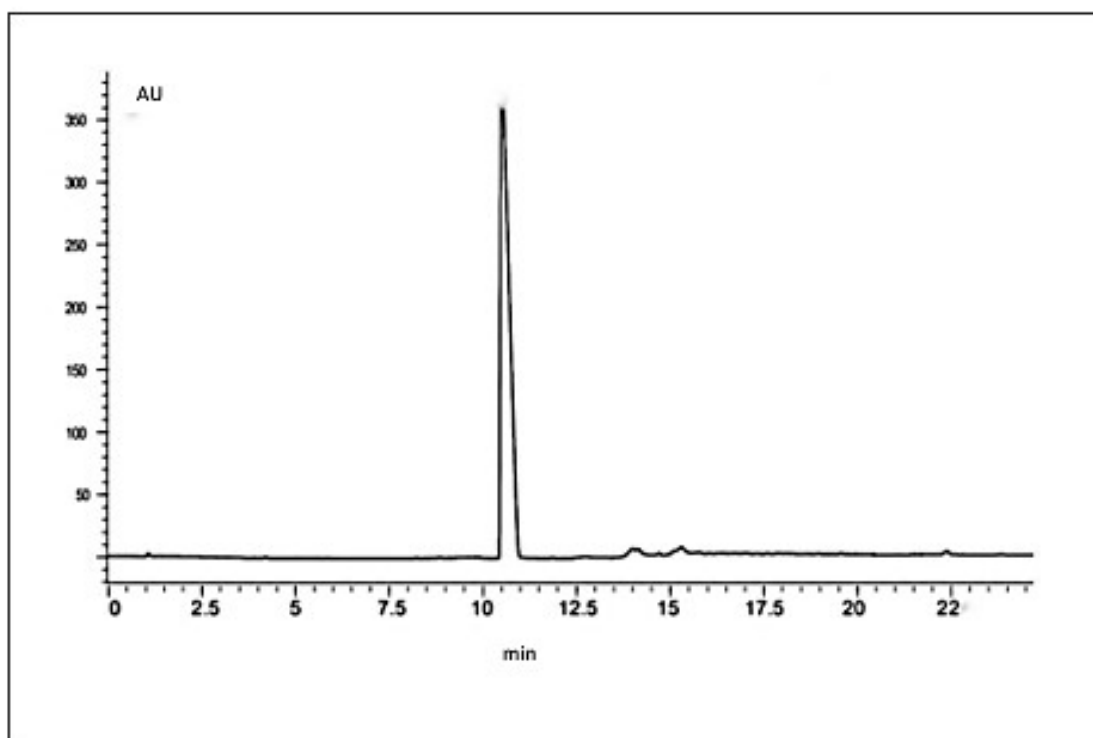

**Fig. S5**



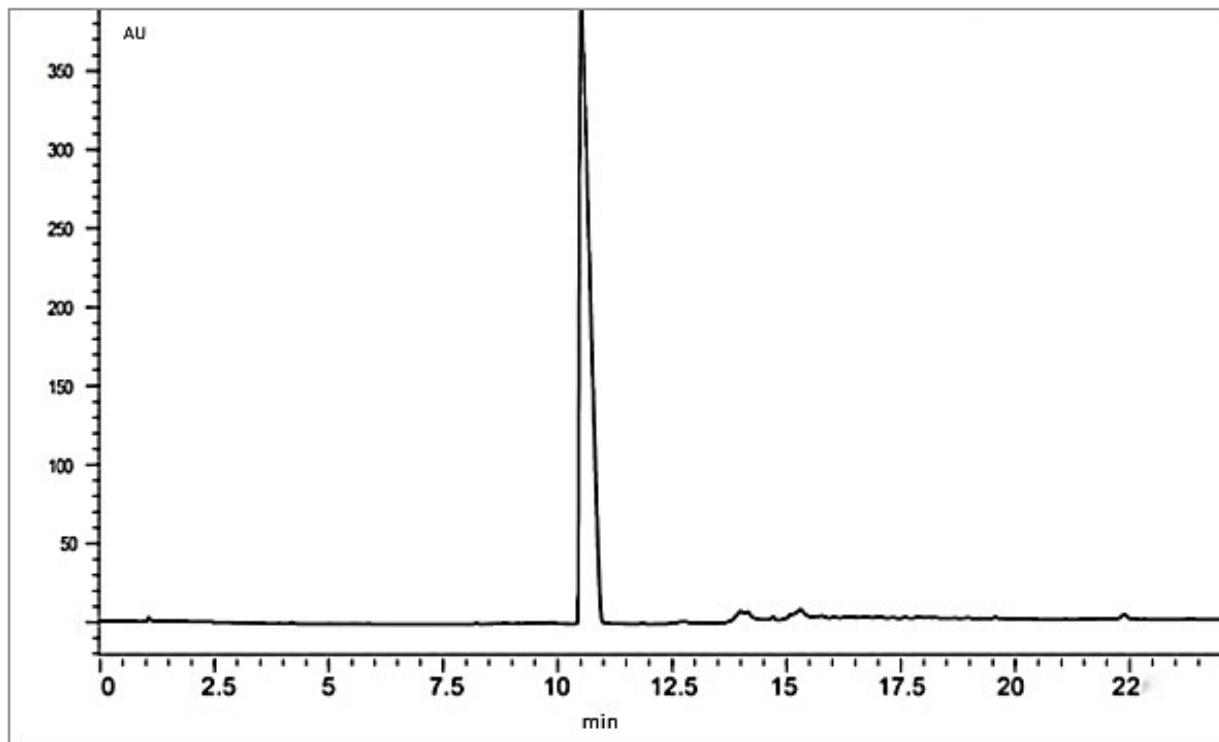

**Fig. S6**
